# Supplementary material
Source: PubMed Central journal article supplement (PMC6819108)
Supplement: jci-129-128840-s049.pdf [file jci-129-128840-s049.pdf]

**SUPPLEMENTAL FIGURES LEGENDS FOR  
Demonbreun et al. Recombinant annexin A6 promotes membrane repair and  
protects against muscle injury**

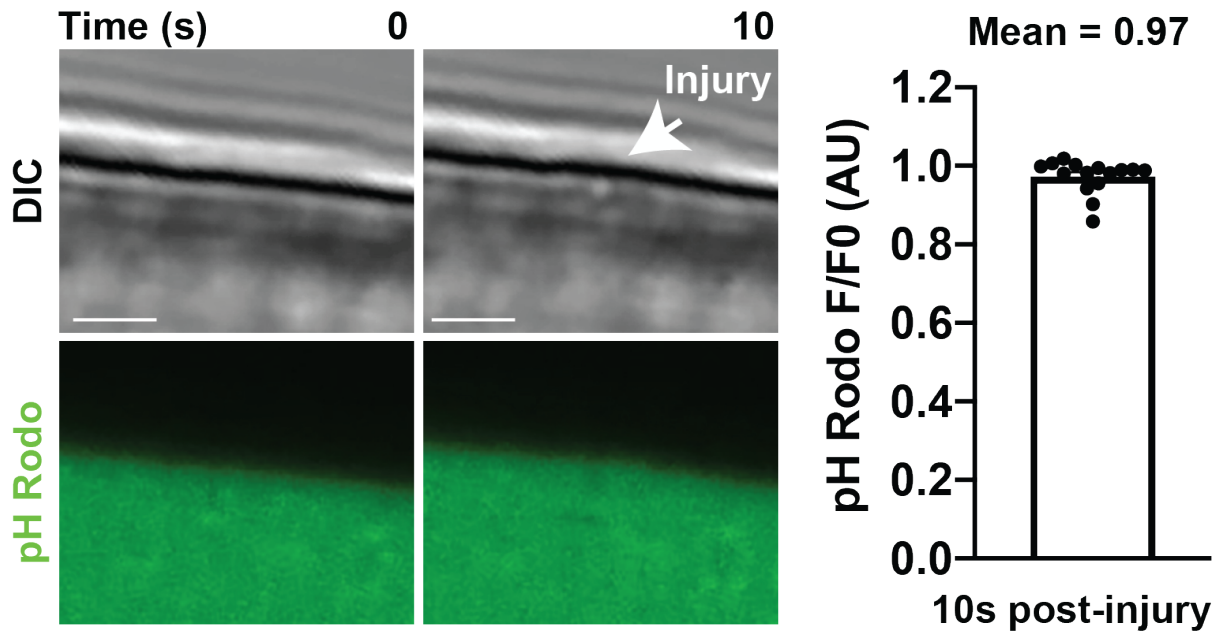

**Supplemental Figure 1. Lack of visible pH change immediately after membrane injury.** Myofibers were laser injured in the presence of the pH fluorescence indicator pH Rodo AM. The pH remained unchanged between pre injury (0s) and post-injury (10s) expressed as F/F0 mean = 0.97, where a value of 1 is identical.

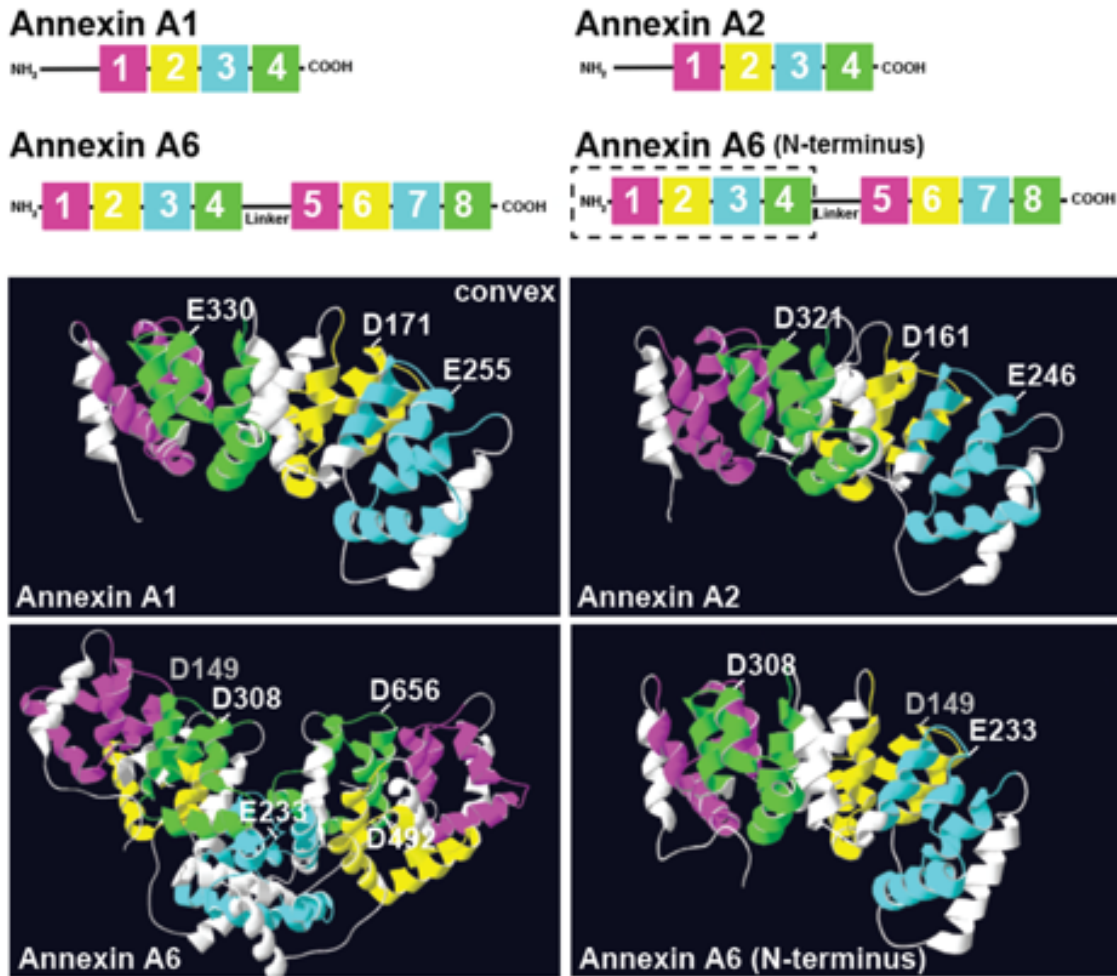

**Supplemental Figure 2. Domain modeling of annexin's multiple  $\text{Ca}^{2+}$  binding sites.**

Annexins typically contain four annexin domains (pink, yellow, blue and green) with the exception of annexin A6, which is duplicated to have 8 annexin domains. Annexin A1, A2, and A6 coordinate multiple  $\text{Ca}^{2+}$  ions and bind membrane on the convex face, positioned facing the top of each ribbon diagram. The D171 residue in annexin A1 and the D161 residue in annexin A2 were previously described as necessary residues to coordinate  $\text{Ca}^{2+}$  binding (43). Both D171 and D161 localize in the second (yellow) annexin domain in annexin A1 and A2, respectively. The orthologous residue in annexin A6, D149, which falls into the first half of annexin A6, was not observed to coordinate  $\text{Ca}^{2+}$  in bovine A6 (44). [www.rcsb.org](http://www.rcsb.org). In this study, we examined D149 in annexin A6 as well as E233, which fall into the second (yellow) and third (blue) annexin domains, respectively.

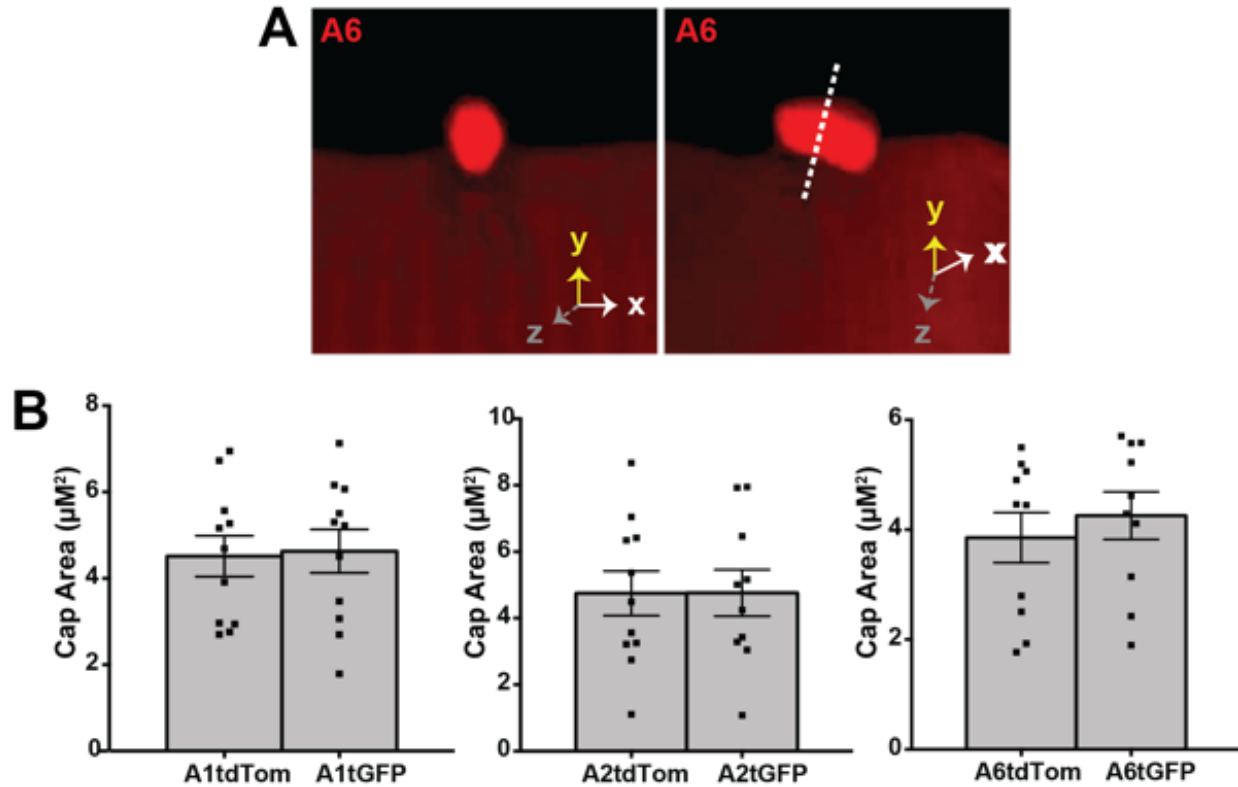

**Supplemental Figure 3. A)** Max projection of Z-stack imaging of repair cap (left). Rotated Z-stack projection (right). Cap size is measured from the center z-stack 2-D image represented by the white dotted line. **B)** Myofibers were co-electroporated with wildtype annexin-tdTomato and wildtype annexin-turboGFP. Cap size was assessed in both the red and green channels. The type of fluorescent tag did not influence cap size. Data are expressed as mean  $\pm$  SEM. Differences were tested by two-tailed t-test, ( $n \geq 10$  fibers per condition).

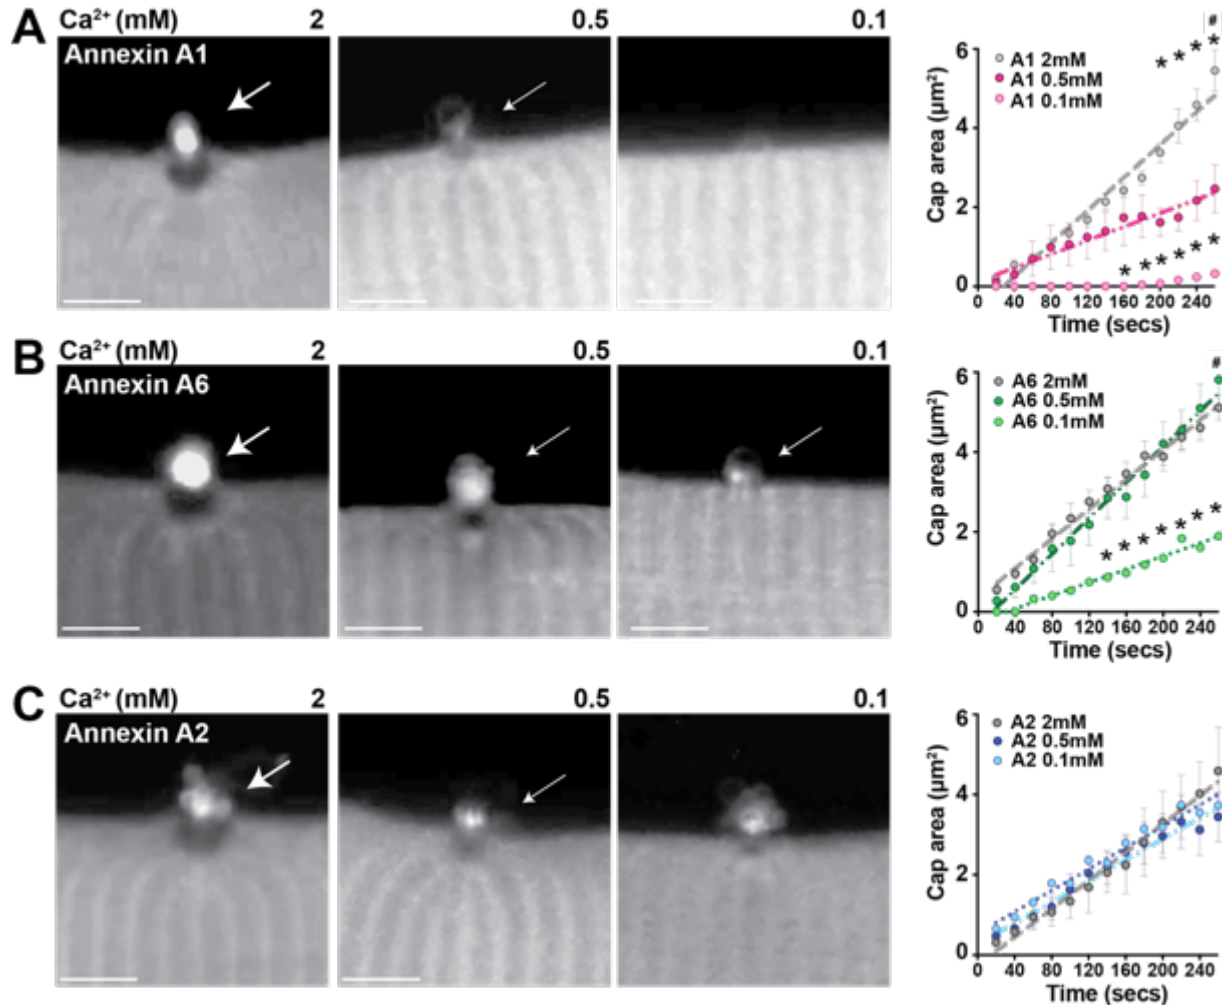

**Supplemental Figure 4. Differential Ca<sup>2+</sup> sensitivity of annexin A1, A2 and A6 in repair cap formation.** Myofibers expressing fluorescently tagged annexin A1, A2 or A6 were injured at multiple Ca<sup>2+</sup> concentrations. **A & B**) Annexin A1 and A6 repair cap size was reduced with decreasing Ca<sup>2+</sup> concentrations. Annexin A1 and A6 repair cap area and rate of repair cap formation was reduced at 0.5mM Ca<sup>2+</sup> and 0.1mM compared to 2mM. **C**) Annexin A2 repair cap area was significantly reduced at 0.05mM Ca<sup>2+</sup> compared to 2mM, 0.5µM, and 0.1mM Ca<sup>2+</sup>. The rate of annexin A2 repair cap formation was equivalent at the Ca<sup>2+</sup> concentrations tested. Data from the 0.05mM concentration was not plotted as caps were too small to measure over time. Large arrow indicates large cap. Small arrow indicates small cap. Scale bar 5µm. Data are expressed as mean ± SEM. Differences were tested by 2-way ANOVA with Bonferroni's multiple comparisons test. \*p<0.05 cap area or time, #p<0.05 statistically different slopes (n= 4-7 myofibers per condition).

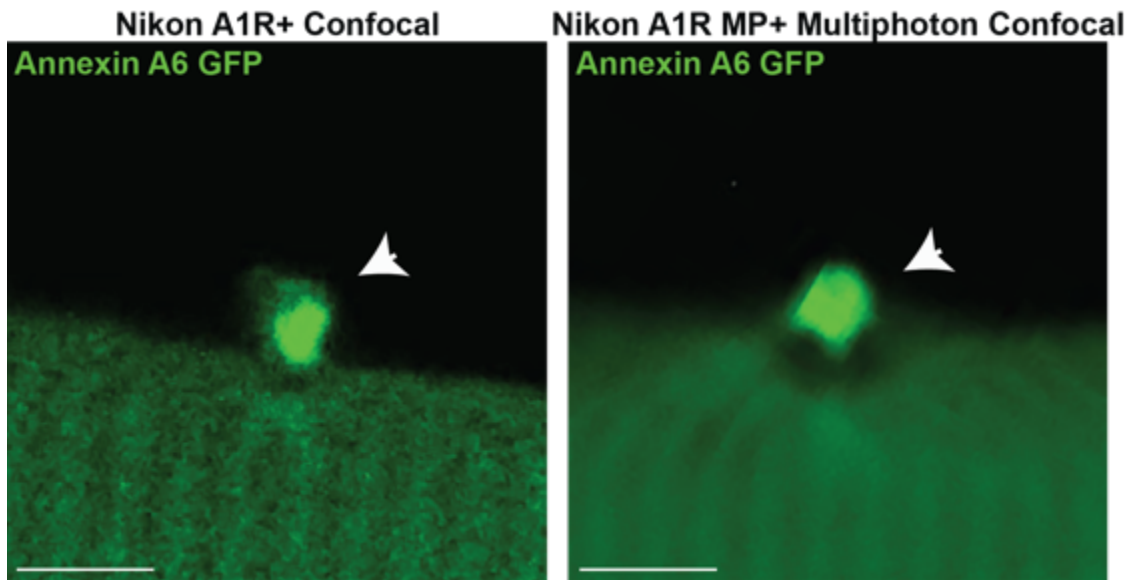

**Supplemental Figure 5.** Myofiber laser injury on the Nikon A1R+ GaSP confocal and the Nikon A1R MP+ multiphoton confocal induced comparable annexin A6-GFP repair caps (arrowhead) at the site of membrane injury. Scale 5 $\mu$ m, ( $n \geq 3$  mice per condition).

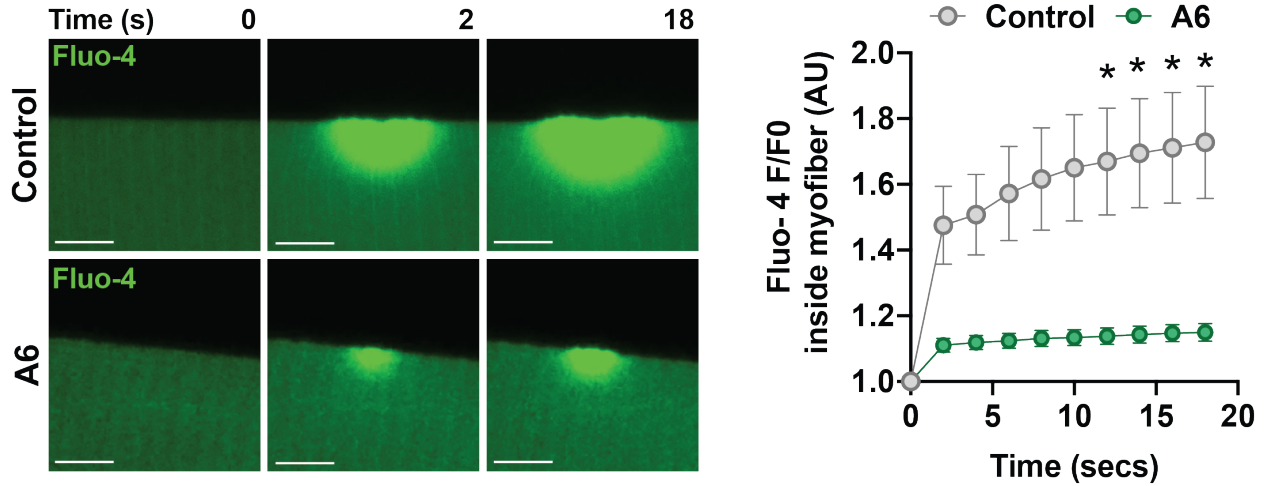

**Supplemental Figure 6. Decreased Fluo-4 Ca<sup>2+</sup> levels at that site of injury with annexin A6 expression.** Myofibers were preloaded with the fluorescent Ca<sup>2+</sup> indicator dye, Fluo-4, and the sarcolemma subsequently injured with a confocal laser. Myofibers overexpressing annexin A6 had significantly decreased levels of internal Fluo-4 Ca<sup>2+</sup> fluorescence at the site of membrane injury compared to control myofibers, similar to results obtained with the protein-based Ca<sup>2+</sup> indicator GCaMP5G. Scale bar 5µm. Data are expressed as mean ± SEM. Differences were tested by 2-way ANOVA with Bonferroni's multiple comparisons test \* p<0.05, (n=3 mice; n≥ 8 myofibers per condition).

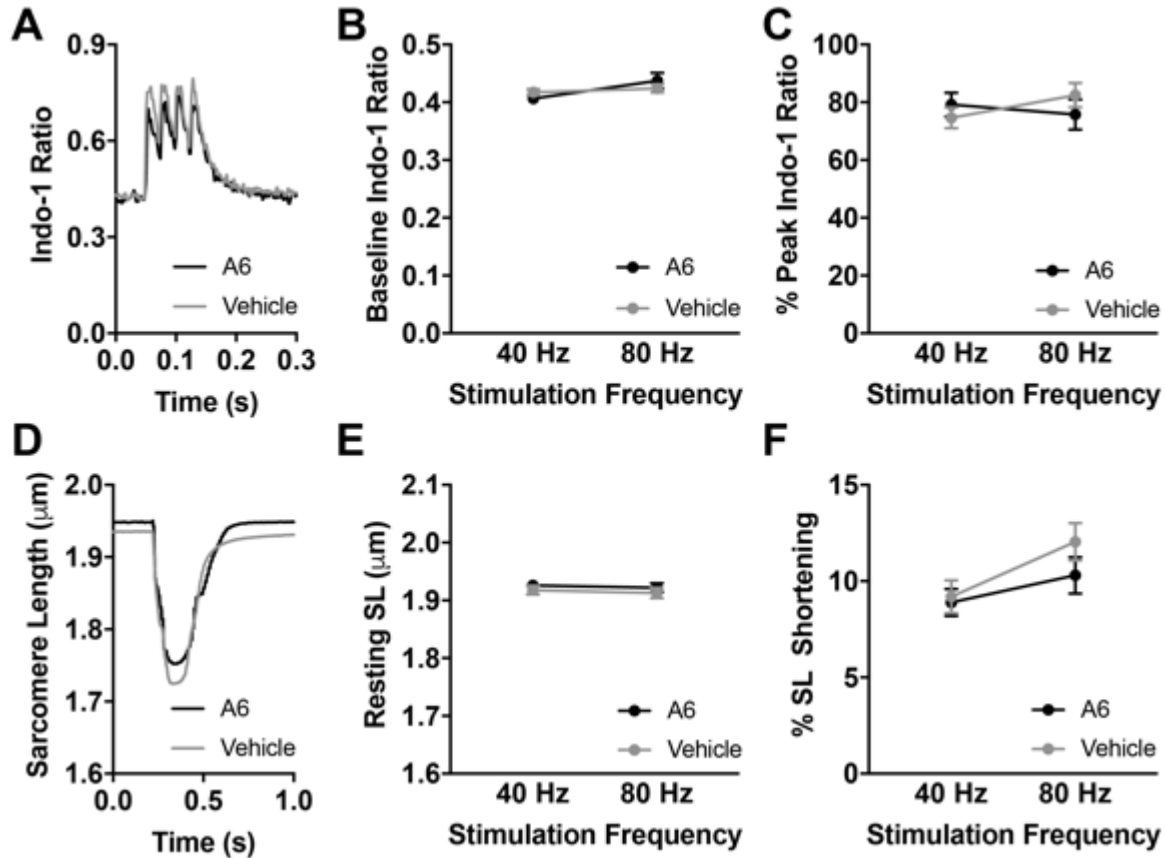

**Supplemental Figure 7. Baseline Ca<sup>2+</sup> is not changed in myofibers overexpressing annexin A6.** Myofibers electroporated with annexin A6-GFP or vehicle control. Isolated myofibers were loaded with Indo-1 AM dye and stimulated to measure Ca<sup>2+</sup> cycling and cell shortening. **A)** Representative Ca<sup>2+</sup> transient at 80Hz. **B & C)** Resting Ca<sup>2+</sup> levels and peak Ca<sup>2+</sup> transient values were not changed between myofibers electroporated with annexin A6-GFP or vehicle control. **D)** Representative sarcomere length shortening traces. **E & F)** Resting sarcomere length and peak unloaded sarcomere length shortening did not differ between treatment groups. Data are expressed as mean ± SEM. Differences were tested by 2-way ANOVA (A, D) or two-tailed t-test (B, C, E, F), (n≥30 myofibers from n≥3 mice per condition).

**A**

**Annexin mouse protein alignment**  
**Ca<sup>2+</sup> binding sites based on published crystal structure**

Type II Ca<sup>2+</sup> binding Site

Conserved D/E residue

Conserved residues in A6 that did not coordinate Ca<sup>2+</sup>

Underline indicates conservation

|    |     |                                                                                                                |     |
|----|-----|----------------------------------------------------------------------------------------------------------------|-----|
| A1 | 121 | DELRGAM <u>KGLG</u> TDEDTLIEILTTRSNEQIREINRVYREELKRD <sup>D</sup> LAKDITS <sup>D</sup> TSGD <sup>D</sup> FRKAL | 180 |
| A2 | 112 | SELKAS <u>MKGLG</u> TDEDSLIEIICSRTNQELQEINRVYKEMYKTDLEKDIIS <sup>D</sup> TSGD <sup>D</sup> FRKLM               | 171 |
| A6 | 99  | KEIKDAIS <u>GVG</u> TDEKCLIEILASRTNEQMHQLVAAYKDAYERDLES <sup>D</sup> DIIG <sup>D</sup> TSGHFQKML               | 158 |

**B**

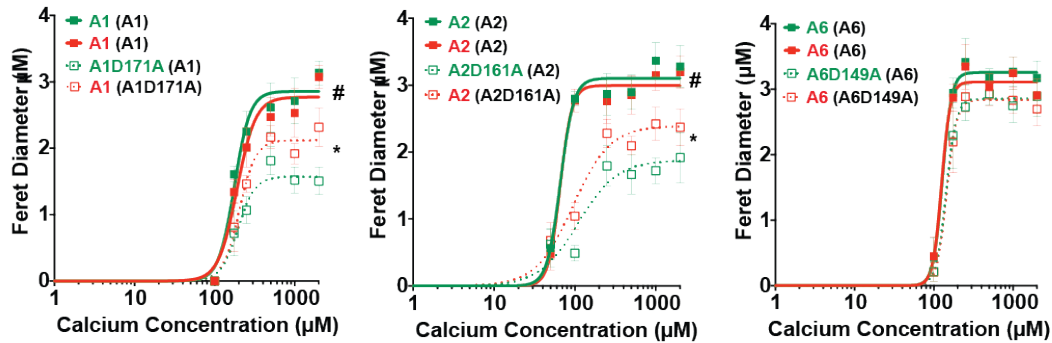

**C**

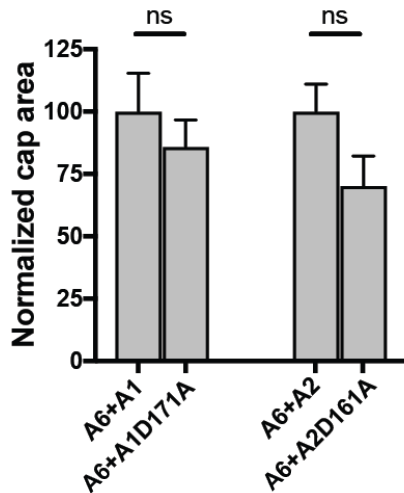

**Supplemental Figure 8. A)** The first type II Ca<sup>2+</sup>-binding site in annexin A1 and A2 is conserved, while it is not conserved in annexin A6. **B)** Myofibers were co-electroporated with wildtype+wildtype or wildtype+mutant annexin constructs and cap size was assessed after sarcolemmal injury. Parentheses indicate protein that is co-expressed in the myofiber, but not visualized within the channel, to determine the effect on the co-expressed annexin. Cap kinetics were plotted as cap feret diameter over a range of Ca<sup>2+</sup> concentrations, from 0-2mM. Expression of mutant annexin A1D171A and A2D161A, but not A6D149A was sufficient to significantly reduce the co-expressed wildtype annexin cap maximum diameter (D<sub>MAX</sub>). **C)** Expression of annexin A1D171A and A2D161A was not sufficient to significantly reduce the cap area of co-expressed annexin A6, although annexin A2D161A results were trending. Data are expressed as mean ± SEM. Differences were tested by 2-way ANOVA with Bonferroni's multiple comparisons test (B) or two-tailed t-test (C). \* p<0.05 #, ns = non-significant, (n≥5 myofibers from n≥3 mice per condition).





## **SUPPLEMENTAL MOVIE LEGENDS**

**Supplemental Movie 1.** Shown is tdTomato-labeled annexin A6 (red) co-expressed with the  $\text{Ca}^{2+}$  indicator GCaMP5G (green) highlighting large GCaMP5G-positive, external blebs extruding from the site of injury.

**Supplemental Movie 2.** Overexpression of GFP-labeled annexin A2 (green) in myofibers, is sufficient to induce dynamic, annexin A2-positive, external bleb formation at the site of injury.
